# Supplementary material for: Role of hepatic PKCβ in nutritional regulation of hepatic glycogen synthesis
Source: PubMed Central journal article supplement (PMC8525638; doi:10.1172/jci.insight.149023), 2021-10-08

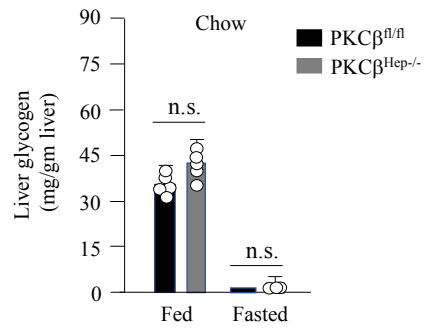

Supplementary Figure 1

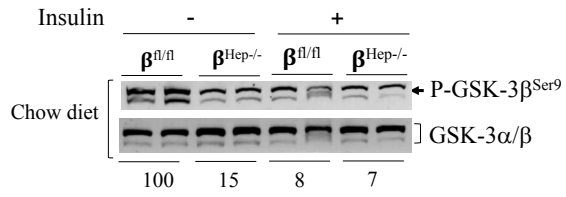

Supplementary Figure 2

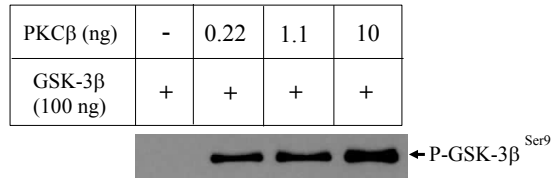

Supplementary Figure 3

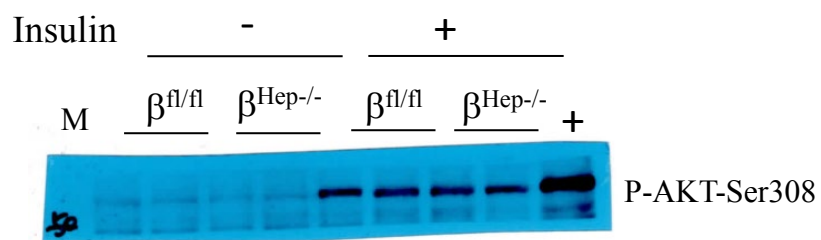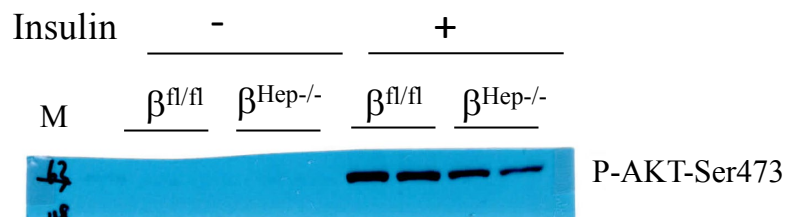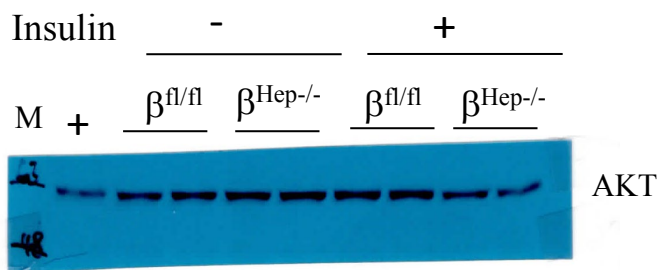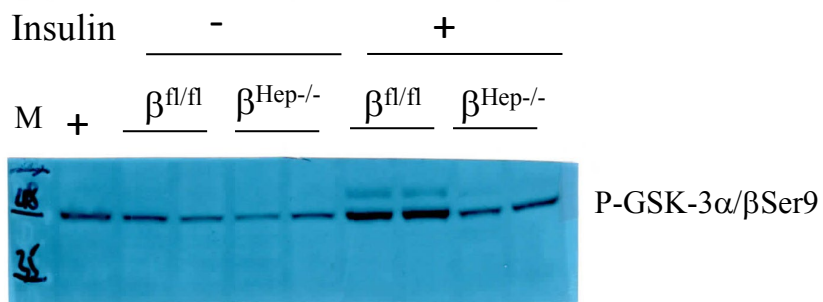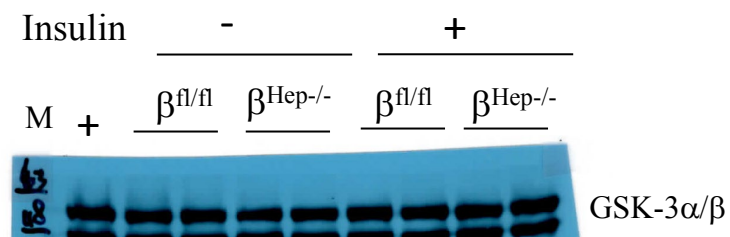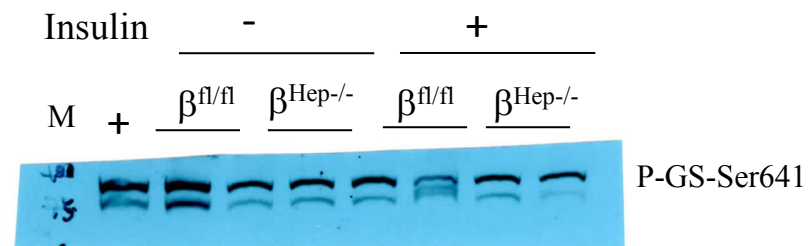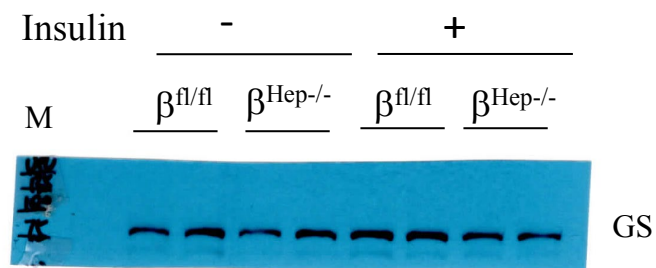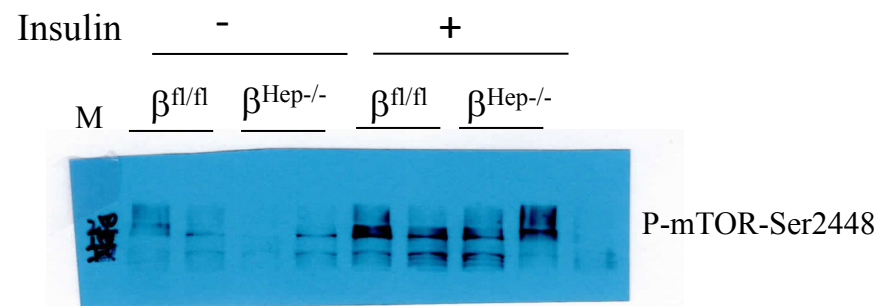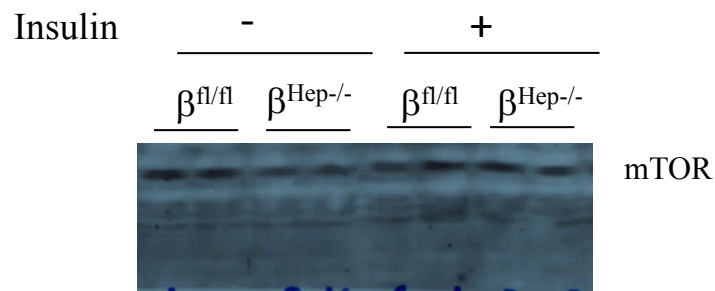

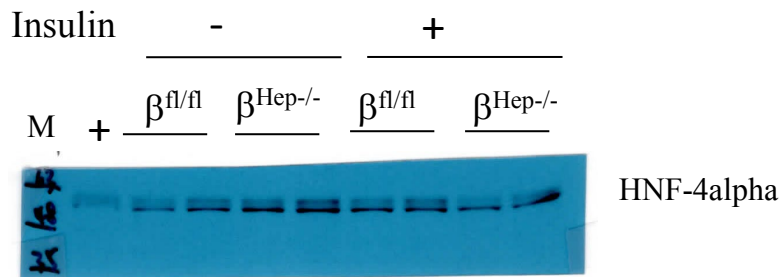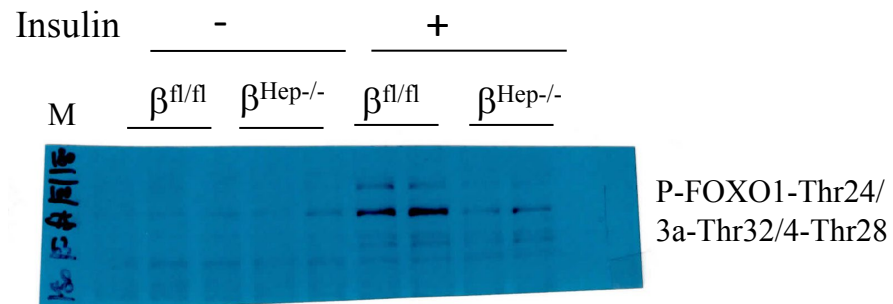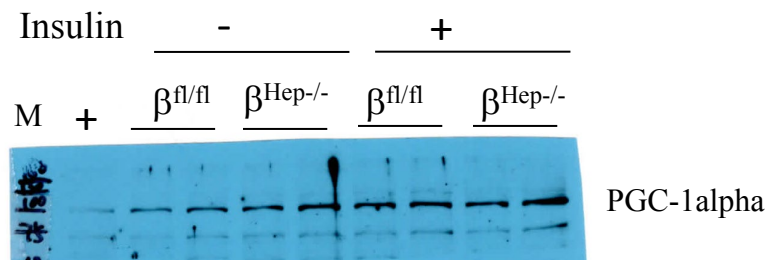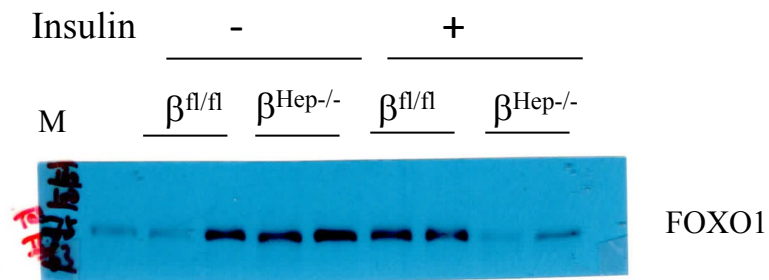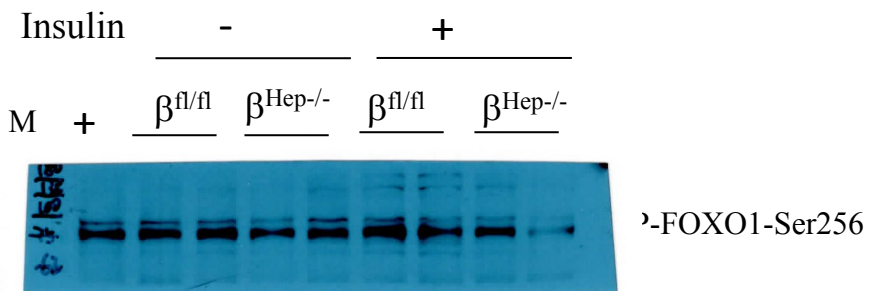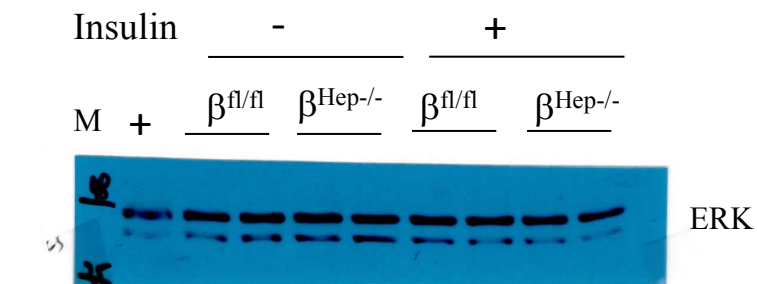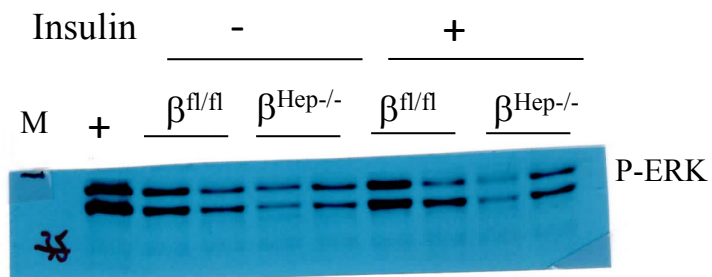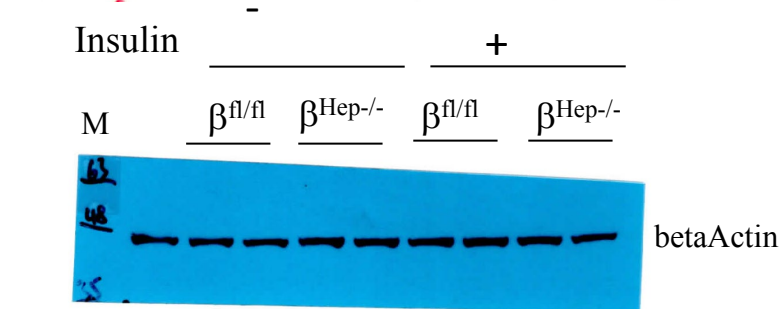

Supplement: jciinsight-6-149023-s324.pdf [file jciinsight-6-149023-s324.pdf]
